# Supplementary material for: China Patient-centered Evaluative Assessment of Cardiac Events Prospective Study of Acute Myocardial Infarction: Study Design
Source: PubMed Central journal article supplement — Chin Med J (Engl). 2016 Jan 5;129(1):72–80. doi: 10.4103/0366-6999.172596 (PMC4797546; doi:10.4103/0366-6999.172596), 2016-01-05
Supplement: CMJ-129-72_Suppl1.pdf [file CMJ-129-72_Suppl1.pdf]

## SITE INVESTIGATORS BY HOSPITAL

Air Force General Hospital, PLA, Yingbin Xiao, Haitao Zhang, Congchun Huang; Anhui Provincial Hospital, Likun Ma, Hao Hu, Xiangyong Kong; Baotou Central Hospital, Ruiping Zhao, Wei Du, Hongyu Li; Beijing Chao-Yang Hospital, Capital Medical University, Xinchun Yang, Mullei Chen, Xiaotao Zhao, Zhiyong Zhang; China – Japan Union Hospital of Jilin University, Ping Yang, Zhaohui Feng, Cuiying Mao, Bing Li; Dongfeng County Hospital, Wei Liu, Xiaoxin Li, Yanbin Zhang, Wen Cui; Feng County People's Hospital, Feng Wang, Sizhao Li, Qun Luo; First Hospital of Shanxi Medical University, Qinghua Han, Liqin Duan, Chunrong Jin; Fujian Provincial Hospital, Yansong Guo, Xinjing Chen, Feng Lin; General Hospital of China FAW Group Corporation, Hongtao Pan, Peng Gao, Lei Sun; Guilin People's Hospital, Wei Zhang, Shuyun Xie, Yanni Zhang, Wei Li; Inner Mongolia Baogang Hospital, Zhiping Ge, Huihua Wen, Qiaoling Liu, Yongdong Li; Jiangxi Provincial People's Hospital, Lang Hong, Linfeng Li, Lihua Yuan, Yun Li; Jinghai County Hospital, Peihua Zhao, Jingsheng Sun, Rengui Chai; Kuandian Manchu Autonomous County Central Hospital, Danbing Zhou, Tongbao Sang, Dongxue Song; Laixi People's Hospital, Xu Jiang, Guohao Xu, Yanrong Song, Hui Liu; Laoting County Hospital, Keyong Shang, Changjiang Liu, Kuituan Xi, Ying Yu; Lujiang County People's Hospital, Kelian Xu, Cunqi Wang, Yongan Qian; Minhou County Hospital, Ying Yang, Jianbin Huang, Er Zhuo; Nanyang Central Hospital, Shouzhong Yang, Yudong Li, Jianbu Gao, Songyu Zhang; Pi County People's Hospital, Tianhu Liu, Mingjun Yan, Zhaoping Yu; Port Hospital of Hebei Port Group Company, Ltd, Xia Wu, Penghui Yang, Fang Liu; Qingdao Fuwai Hospital, Ying Yang, Guixin Wu, Jiajia Mao, Cheng Zheng; Qinghai Cardiovascular and Cerebrovascular Hospital, Huiping Bian, Bo Chen, Jiandong Cao; Qinzhou Second People's Hospital, Hua Yan, Liyuan Chen, Qiuxia Liu, Lin Chen; Quwo County People's Hospital, Xiwu Wang, zhenlin Wu, Qiang Wang, Chaohui Shangguan; Shangxi Cardiovascular Hospital, Bao Li, Bin Yang, Jianhua Li, Jianhong Wang; Shenyang Northern Hospital, Shenyang, 110016, China, Yaling Han, Xiaozeng Wang, Haiwei Liu; Shuangcheng People's Hospital, Cheng Zhang, Aiguo Sun, Lijuan Gao; Suzhou Kowloon Hospital, Shanghai Jiao Tong University School of Medicine, Feng Liu, Xiangfei Meng, Bo Shao, Zhanling Liao; The Affiliated Hospital of Qingdao University, Changyong Zhou, Yini Wang, Tao Yu; The First Affiliated Hospital of Fujian Medical University, Jinxiu Lin, Dajun Chai, Wenxiang Zhao; The First Affiliated Hospital of Henan University of Science & Technology, Pingshuan Dong, Laijing Du, Ximei Fan; The First Hospital of Jilin University, Yang Zheng, Zhaoxi Liu, Wenqian Zhou, Lin Zou; The Fourth Affiliated Hospital of China Medical University, Yuanzhe Jin, Xiaohong Zhang, Xueying Zhang; The Fourth Affiliated Hospital of Shihezi University&First Division Hospital of the Xinjiang Production and Construction Corps, Chunxi Cha, Ren Luo, Min Tian, Juan Ren; The people's hospital of Dongxihu district of Wuhan, Yongbo Lin, Ling Zhou, Lin Xu; The People's Hospital of Liaoning Province, Zhanquan Li, Ying Liu, Qian Yu, Yan Xing; The people's hospital of Wuchuan, Yuanming Yi, Xuelian Deng, Guan hong Wu; The Second Affiliated Hospital of Harbin Medical University, Bo Yu, Shuo Zhang, Shuang Yang; The Second Affiliated Hospital of Xuzhou Medical College, Weiheng Wu, Li Li, Jianqi Feng; The Second Affiliated Hospital of Zhengzhou University, Xianen Fa, Lihua Zhang, Liqiang Sun, Lei Liu; The Second Hospital of Dalian Medical University, Peng Qu, Hongyan Wang, Dayuan Lou, Dajun Yuan; Tianjin Medical University General Hospital, Zheng Wan, Yuemin Sun, Bo Bina; Wuhan Asia Heart Hospital, Xi Su, Songzhi Zhao, Wei Wu, Yujing Fan; Wulate County People's Hospital, Jianye Fu, Fuqin Han, Yunmei Wang; Xiangtan Central Hospital, He Huang, Jianping Zeng, Mingxing Wu, Yi Zhou; Xinmi First People's Hospital, Fusheng Zhao, Xiao wang, Guangming Yang; Xinmin People's Hospital, Bo Jiang, Liwei Qi, Tongying Li; Xinqiao Hospital; XuZhou Central Hospital, Qiang Fu, Zhenyong Li, Peng Wei, Yi Lu; Xuzhou First People's Hospital, Hongju Zhang, Liuxiao Jun, Ming Hu, Wei Li; You County People's Hospital, Qingdong Liu, Qingquan Yang, Jide Wu; Zhengzhou Central Hospital, Lin Zhang, Yumei Guo, Huiling Sun
