# Supplementary material for: China Patient-centered Evaluative Assessment of Cardiac Events Prospective Study of Acute Myocardial Infarction: Study Design
Source: PubMed Central journal article supplement — Chin Med J (Engl). 2016 Jan 5;129(1):72–80. doi: 10.4103/0366-6999.172596 (PMC4797546; doi:10.4103/0366-6999.172596), 2016-01-05

## SAMPLE SIZE CACULATION

Sample size is determined mainly based on both feasibility and consideration of adequate statistical precision for describing 12-month primary endpoint and PROs in the total population, and secondary or tertiary hospitals separately. The following figure shows the variation of the statistical power based varied assumption.

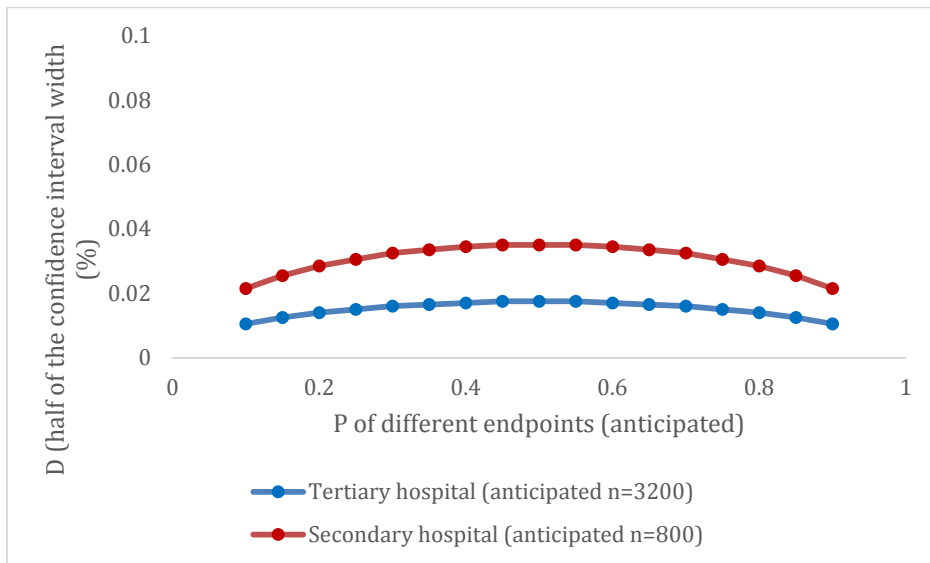

Supplement: CMJ-129-72_Suppl8.pdf [file CMJ-129-72_Suppl8.pdf]
